# Supplementary material for: Clinical and radiographic outcomes after index anterior cervical discectomy and fusion with interbody spacer with integrated anchor fixation: a single-surgeon case study
Source: PubMed Central journal article supplement — J Spine Surg. 2024 Sep 14;10(3):416–27. doi: 10.21037/jss-24-32 (PMC11467272; doi:10.21037/jss-24-32), 2024-09-14
Supplement: jss-10-03-416-dss.pdf [file jss-10-03-416-dss.pdf]

## Data Sharing Statement

|                     |                                                                                                                                                     |                                                                                                                                                                                                 |
|---------------------|-----------------------------------------------------------------------------------------------------------------------------------------------------|-------------------------------------------------------------------------------------------------------------------------------------------------------------------------------------------------|
| <b>Article Info</b> | https://dx.doi.org/10.21037/jss-24-32                                                                                                               |                                                                                                                                                                                                 |
| <b>Item</b>         | <b>Question</b>                                                                                                                                     | <b>Authors' Response<br/>(place "-" if not applicable)</b>                                                                                                                                      |
| 1                   | Would you like to share data collected for your study to others?                                                                                    | No                                                                                                                                                                                              |
| 2                   | If not, would you like to share the reason for your decision?                                                                                       | The data source for this study includes patient information taken directly from our institution's medical records and cannot be publicly shared.                                                |
| 3                   | What data in particular will be shared?                                                                                                             | -                                                                                                                                                                                               |
| 4                   | Any other documents will be shared? Such as study protocol, statistical analysis plan, informed consent form, clinical study report, analytic code. | Statistical analysis plans will be shared upon request. Requests can be emailed to the corresponding author at <a href="mailto:muhammad.abd.el.barr@duke.edu">muhammad.abd.el.barr@duke.edu</a> |
| 5                   | When will data availability begin?                                                                                                                  | -                                                                                                                                                                                               |
| 6                   | When will data availability end?                                                                                                                    | -                                                                                                                                                                                               |
| 7                   | To whom will you share the data?                                                                                                                    | -                                                                                                                                                                                               |
| 8                   | For what type of analysis or purpose?                                                                                                               | -                                                                                                                                                                                               |
| 9                   | How or where can the data/documents be obtained?                                                                                                    | Requests can be emailed to the corresponding author at <a href="mailto:muhammad.abd.el.barr@duke.edu">muhammad.abd.el.barr@duke.edu</a>                                                         |
| 10                  | Any other restrictions?                                                                                                                             | -                                                                                                                                                                                               |
